# Supplementary material for: Horizontally transferred genes in the ctenophore Mnemiopsis leidyi
Source: PeerJ journal article supplement (doi:10.7717/peerj.5067), 2018-06-15
Supplement: HGT_supplemental_v8.pdf [file HGT_supplemental_v8.pdf]

## Supplementary text: commands and parameters for phylogenetic analyses

All files and scripts are available at: [https://github.com/josephryan/2018-Hernandez\\_and\\_Ryan\\_HGT](https://github.com/josephryan/2018-Hernandez_and_Ryan_HGT)

### 1. Alignments

Alignments were generated using MAFFT version 7.305 and trimmed with Gblockswrapper version 0.91b using the following commands:

```
mafft seqs.fa > aln.fa
```

```
Gblockswrapper aln.fa
```

# Gblockswrapper is available here:

[https://bitbucket.org/caseywdunn/labcode/src/master/scripts\\_phylogenomics\\_21Feb2009/Gblockswrapper](https://bitbucket.org/caseywdunn/labcode/src/master/scripts_phylogenomics_21Feb2009/Gblockswrapper)

```
perl -pi -e 's/ //g' aln.fa-gb
```

```
fasta2phy.pl aln.fa-gb > aln.fa-gb.phy
```

# fasta2phy.pl is a script bundled with JFR-PerlModules (Release 1.0+)

<https://github.com/josephryan/JFR-PerlModules/>

### 2. Tree inference

We performed maximum likelihood analyses on the alignments using RAxML version 8.1.21:

```
raxmlHPC -p 1234 -m PROTGAMMAGTR -n ALN -s aln.fa-gb.phy
```

### 3. Hypothesis testing

All commands used for hypothesis testing are in the script `test_hypothesized_phylogenies` uploaded to GitHub. We used the SOWH test as implemented in SOWHAT version 0.36 and the AU test implemented in CONSEL version 0.20. The script `test_hypothesized_phylogenies` generates the metazoan constraint tree as well as bootstrap trees to test as alternative hypotheses against the best tree (i.e., tree indicating HGT) produced by RAxML. The following command is used to run the script:

```
perl test_hypothesized_phylogenies.pl aln.fa-gb.phy dir/
```

### 4. Single copies of bootstrap trees

To make sure that each bootstrap tree only appeared once in a set of 100 generated bootstrap trees (i.e., suboptimal trees) we used the ape package in R with the following commands:

```
library(ape)
```

```
bs<-read.tree(file='RAxML_bootstrap.ALN.bs')
```

```
unique.multiPhylo(bs)
```

## 5. Manually generated suboptimal trees

We used suboptimal trees to address the problem of selection bias which occurs when using the AU test. We manually created suboptimal trees in order to get a feel for how different bootstrap trees were from the optimal tree. Suboptimal trees were manually created by switching the positions of taxa in clades consisting of three taxa from the best tree (Fig. S2). We included 10 manually generated suboptimal trees, or in cases with less than 10 trees, as many as could be generated in each analysis for the AU test. To optimize manually generated suboptimal trees we performed maximum likelihood analyses before implementing the AU test. All manually created suboptimal trees have been uploaded to the accompanying GitHub site.

We used the following commands to optimize each manually generated suboptimal tree:

```
raxmlHPC -p 1234 -m PROTGAMMAGTR -n subtree1 -s aln.fa-gb.phy -g  
RAxMLbestTree1_equalbranch.ALN
```

To run the AU test implemented through CONSEL on the best, metazoan constraint, and manually generated suboptimal trees:

```
cat RAxML_bestTree.ALN RAxML_bestTree.metatree RAxML_bestTree.suboptree1  
RAxML_bestTree.suboptree2 RAxML_bestTree.suboptree3  
RAxML_bestTree.suboptree4 RAxML_bestTree.suboptree5  
RAxML_bestTree.suboptree6 RAxML_bestTree.suboptree7  
RAxML_bestTree.suboptree8 RAxML_bestTree.suboptree9  
RAxML_bestTree.suboptree10 >> 12trees.tre
```

```
raxmlHPC -f g -m PROTGAMMAGTR -n 12trees -s aln.fa-gb.phy -z 12trees.tre
```

```
seqmt --puzzle RAxML_perSiteLLs.12trees
```

```
makermt RAxML_perSiteLLs
```

consel RAxML\_perSiteLLs

catpv RAxML\_perSiteLLs

## 6. Violin plots

We used violin plots to visualize comparisons of likelihood scores between the best tree (i.e., tree indicating HGT), metazoan constraint tree, and suboptimal trees. Violin plots were generated using the script `likelihood_violins` available on the accompanying GitHub site. We also made comparisons between the tree space covered by using bootstrap trees as suboptimal trees (Fig. 3) versus manually created suboptimal trees in the AU test (Fig. S3). We found that the bootstrap trees covered a wider range of tree space than the manually created trees. Therefore, bootstrap trees provide a more stringent test.

## 7. HMMER analysis on HGT candidates absent in other animals

To ensure that these genes (ML012034a, ML18354a, ML219316a) are truly absent in other animals and are not an artifact caused by long-branch *M. leidy* sequences, we performed HMMER searches as an additional method to detect homologous sequences in animals. We used the EMBL-EBI HMMER interface to search for homologous animal sequences in the UniProtKB database. ML012034a had significant hits (E-value  $\leq 0.1$ ) to two animals (*Macrostomum lignano* and *Folsomia candida*). If these were not contaminants, we would expect to find this gene more widely represented in Metazoa. ML18354a and ML219316a each had hits to a single animal, *Lygus hesperus* and *Philodina roseola* respectively. These also are likely to be contaminants since they lack representation among a wider range of animals. In Table S5 we show the best non-animal and animal E-values for each of these genes, as well as the species for the best hits.

## 8. Bayesian inference on *bona fide* HGTs

We used Bayesian methods to validate the topologies resulting from maximum likelihood analyses. We used MrBayes version 3.2.6 under a GTR model to generate Bayesian trees on six of the nine *bona fide* HGTs (ML00955a, ML00555a, ML005129a, ML02771a, ML49231a, ML42441a); the remaining three lacked hits to other animals. We found no major differences between the resulting gene trees and the original maximum likelihood trees. All NEXUS files and embedded commands have been uploaded to the accompanying GitHub in the directory 07-BAYES\_INFERENCE.

## 9. Maximum likelihood analysis with broader taxon sampling of ctenophores for *bona fide* HGTs

To test if including sequences from additional ctenophores affect the outcome of our phylogenetic analyses, we performed maximum likelihood analyses with broader taxon sampling for six of the nine *bona fide* HGTs (ML00955a, ML00555a, ML005129a, ML02771a, ML49231a, ML42441a) which had BLASTP hits to other animals. We used the original sequences from the alignments for maximum likelihood analyses, but also included homologous sequences identified in other ctenophores (Fig 4). All sequences were aligned in MAFFT and trimmed with Gblocksrapper. We then performed maximum likelihood analyses using RAxML and the GTR model. We found no major differences in our resulting phylogenetic topologies compared to our original gene trees, since these HGTs appear to have occurred early in ctenophore evolution. All results have been uploaded to the GitHub repository in the directory 08-MAX\_LIKELIHOOD\_CTENO.

#### **10. Maximum likelihood analysis with broader protistan taxon sampling**

RefSeq includes only a limited number of available non-metazoan eukaryotic lineages, and while we find the loss of a gene from Filasterea, the stem of Choanoflagellata, the stem of Porifera plus Parahoxozoa, but not Ctenophora a more complex scenario than a horizontal gene transfer, it is important to bring as much evidence on this question as is available. As such, we have expanded our protistan taxonomic sampling in the phylogenetic analyses of the nine *bona fide* HGTs. We performed HMMER searches against the Ensembl Protists database to collect the top five similar sequences from this database that were not included in the original analyses. We added these sequences to the original RefSeq-based datasets from the main paper and repeated the phylogenetic analyses as outlined in the methods. All resulting treefiles and alignments have been uploaded to the GitHub repository in the directory 09-EXPANDED\_EUK\_MAXLIKELIHOOD.

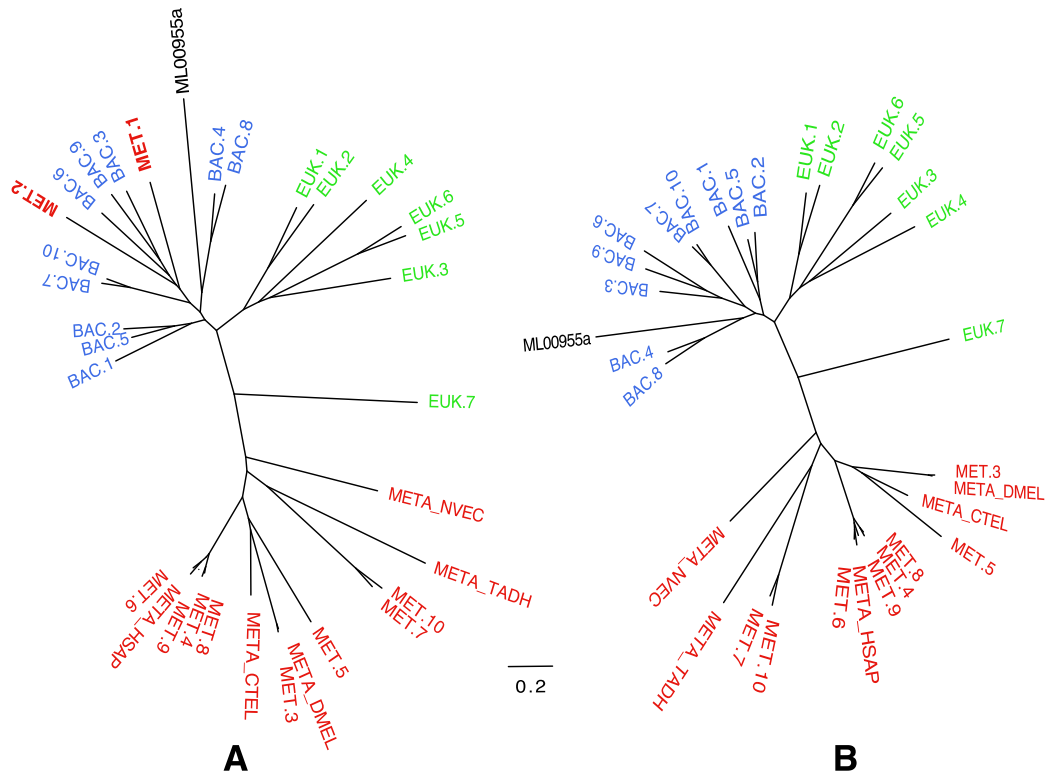

**Figure S1. Maximum-likelihood analyses on an HGT candidate that includes metazoan sequences outside of the main metazoan clade.** ML00955a (in black) is the *M. leidyi* HGT candidate. (A) Because there were only two non-*Mnemiopsis* animal sequences outside of the main animal clade (i.e, MET.1 and MET.2), these sequences were considered potential contaminants and removed. (B) RAxML analysis on the same alignment after pruning MET.1 (*Pantholops hodgsonii*) and MET.2 (*Caenorhabditis remanei*). Taxa that are prefixed “META\_” are from our alien\_index database version 0.01 (i.e., META\_NVEC (*Nematostella vectensis*), META\_TADH (*Trichoplax adhaerens*), META\_HSAP (*Homo sapiens*), META\_CTEL (*Capitella teleta*), META\_DMEL (*Drosophila melanogaster*). MET=Metazoa; BAC=Bacteria; EUK=Eukaryota; FUN=Fungi; More details for each taxa are specified in Table S3.

| <b>Species</b>                                           | <b>Lineage</b>            |
|----------------------------------------------------------|---------------------------|
| <i>Acanthamoeba castellanii</i>                          | Amoebozoa                 |
| <i>Aspergillus nidulans</i>                              | Fungi                     |
| <i>Candidatus aquiluna sp imcc13023</i>                  | Bacteria / Terrabacteria  |
| <i>Candidatus nitrosopumilus salaria bd31</i>            | Archaea                   |
| <i>Candidatus pelagibacter sp imcc9063</i>               | Bacteria / Proteobacteria |
| <i>Glaciecola pallidula dsm 14239 acam 615</i>           | Bacteria / Proteobacteria |
| <i>Marine gamma proteobacterium htcc2080</i>             | Bacteria / Proteobacteria |
| <i>Marine group i thaumarchaeote scgc<br/>aaa799 b03</i> | Archaea                   |
| <i>Marinobacter adhaerens hp15</i>                       | Bacteria / Proteobacteria |
| <i>Phaeodactylum tricornutum</i>                         | Stramenopiles             |
| <i>Saccharomyces cerevisiae</i>                          | Fungi                     |
| <i>Thalassiosira pseudonana</i>                          | Stramenopiles             |
| <i>Amphimedon queenslandica</i>                          | Animal / Porifera         |
| <i>Capitella teleta</i>                                  | Animal / Annelida         |
| <i>Crassostrea gigas</i>                                 | Animal / Mollusca         |
| <i>Daphnia pulex</i>                                     | Animal / Arthropoda       |
| <i>Drosophila melanogaster</i>                           | Animal / Arthropoda       |
| <i>Helobdella robusta</i>                                | Animal / Annelida         |
| <i>Lottia gigantea</i>                                   | Animal / Mollusca         |
| <i>Nematostella vectensis</i>                            | Animal / Cnidaria         |
| <i>Strigamia maritima</i>                                | Animal / Arthropoda       |
| <i>Strongylocentrotus purpuratus</i>                     | Animal / Echinodermata    |
| <i>Trichoplax adhaerens</i>                              | Animal / Placozoa         |
| <i>Homo sapiens</i>                                      | Animal/ Chordata          |

**Table S1. Species used in initial alien\_index run to identify HGT candidates.** This database is available here: [http://ryanlab.whitney.ufl.edu/downloads/alien\\_index/](http://ryanlab.whitney.ufl.edu/downloads/alien_index/)

| Gene ID    | AI          | Best E-Value | Best non-alien E-value |
|------------|-------------|--------------|------------------------|
| ML070218a  | 240.2673574 | 9.00E-117    | 2.00E-12               |
| ML21002a   | 169.1873241 | 3.00E-91     | 9.00E-18               |
| ML018031a  | 163.5889021 | 9.00E-72     | no hits                |
| ML132017a  | 161.5864216 | 2.00E-117    | 3.00E-47               |
| ML120721a  | 156.2393141 | 7.00E-107    | 5.00E-39               |
| ML012034a  | 151.0543254 | 1.00E-69     | 4.00E-04               |
| ML00955a   | 143.6765665 | 8.00E-145    | 2.00E-82               |
| ML046416a  | 133.5499354 | 1.00E-91     | 1.00E-33               |
| ML00555a   | 132.8567882 | 4.00E-79     | 2.00E-21               |
| ML005129a  | 132.163641  | 4.00E-65     | 1.00E-07               |
| ML02771a   | 131.9404975 | 5.00E-58     | no hits                |
| ML06718a   | 124.339595  | 1.00E-54     | no hits                |
| ML296211a  | 117.0953675 | 7.00E-74     | 5.00E-23               |
| ML03277a   | 116.0455454 | 4.00E-51     | no hits                |
| ML085726a  | 107.1228871 | 9.00E-84     | 3.00E-37               |
| ML02232a   | 105.9189143 | 1.00E-46     | no hits                |
| ML49231a   | 98.09486827 | 2.00E-58     | 8.00E-16               |
| ML102910a  | 87.60359405 | 9.00E-39     | no hits                |
| ML073257a  | 85.60111355 | 2.00E-55     | 3.00E-18               |
| ML18354a   | 85.41879199 | 8.00E-38     | no hits                |
| ML019144a  | 84.50250126 | 6.00E-46     | 3.00E-09               |
| ML177319a  | 83.58621053 | 1.00E-85     | 2.00E-49               |
| ML227811a  | 82.09455565 | 2.00E-82     | 9.00E-47               |
| ML049014a  | 79.89733107 | 2.00E-41     | 1.00E-06               |
| ML207910a  | 79.38650545 | 1.00E-74     | 3.00E-40               |
| ML1541114a | 76.67845525 | 1.00E-117    | 2.00E-84               |
| ML092610a  | 70.6869907  | 2.00E-45     | 1.00E-14               |
| ML03547a   | 69.77069997 | 4.00E-44     | 8.00E-14               |
| ML22167a   | 66.08182052 | 1.00E-64     | 5.00E-36               |
| ML102221a  | 65.85867696 | 1.00E-88     | 4.00E-60               |
| ML009115a  | 55.95518941 | 1.00E-33     | 2.00E-09               |
| ML00881a   | 55.26204223 | 1.00E-24     | no hits                |
| ML00882a   | 51.57316278 | 4.00E-23     | no hits                |
| ML00556a   | 50.94455412 | 3.00E-35     | 4.00E-13               |
| ML42441a   | 50.65687205 | 2.00E-130    | 2.00E-108              |
| ML23958a   | 48.64196903 | 3.00E-38     | 4.00E-17               |
| ML219316a  | 46.05170186 | 1.00E-20     | no hits                |

**Table S2. HGT candidates identified by alien index (Fig. 1A).** AI designates the alien index values for each candidate. All HGT candidates had a better hit to a non-animal (shown under the best E-value). Each of these genes were BLASTed against the RefSeq database (Fig.1B). Genes that are not highlighted show HGT candidates

with no significant BLAST hits to animals in the RefSeq database. Genes highlighted in orange underwent maximum likelihood analyses, but were not supported as HGTs (i.e., they were closely related to animals). Genes highlighted in blue show HGT candidates that were more closely related to non-animals and underwent hypothesis testing (Fig. 1C).



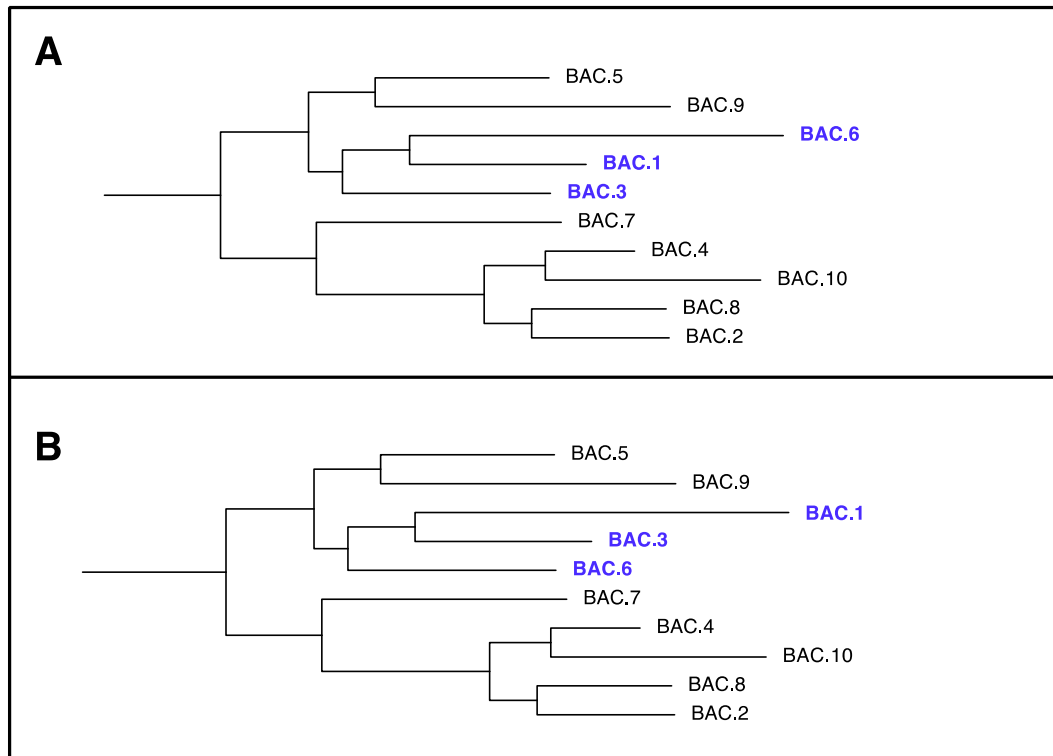

**Figure S2. Examples of manually generated suboptimal trees.** Suboptimal trees were manually generated by taking the best RAxML tree from each alignment and switching the positions of taxa in clades of three. All branch lengths were made equal when performing taxa switches and then optimized using RAxML. Blue text in the figure highlights the clade of three taxa in which positions of taxa will be rearranged. (A) Clade of bacteria resulting from the best maximum-likelihood tree. (B) Manually generated suboptimal tree that resulted from rearrangement of taxa highlighted in blue from the clade in (A).

| Label   | Species                                  | Accession no.                                        |
|---------|------------------------------------------|------------------------------------------------------|
| Bac. 1  | <i>Solitalea canadensis</i>              | WP_014679673.1                                       |
| Bac. 2  | <i>Pontibacter actiniarum</i>            | WP_025607756.1                                       |
| Bac. 3  | <i>Microbulbifer agarilyticus</i>        | WP_010132679.1                                       |
| Bac. 4  | <i>Stenotrophomonas</i>                  | WP_055768138.1                                       |
| Bac. 5  | <i>Rufibacter</i> sp. DG31D              | WP_053093794.1                                       |
| Bac. 6  | <i>Idiomarina zobellii</i>               | WP_053954579.1                                       |
| Bac. 7  | <i>Echinicola vietnamensis</i>           | WP_015263982.1                                       |
| Bac. 8  | <i>Arenimonas metalli</i>                | WP_052575499.1                                       |
| Bac. 9  | <i>Arsukibacterium</i> sp. MJ3           | WP_046552654.1                                       |
| Bac. 10 | <i>Anditalea andensis</i>                | WP_035071114.1                                       |
| Euk. 1  | <i>Thalassiosira pseudonana</i> CCMP1335 | XP_002296777.1                                       |
| Euk. 2  | <i>Guillardia theta</i> CCMP2712         | XP_005831049.1                                       |
| Euk. 3  | <i>Micromonas</i> sp. RCC299             | XP_002501910.1                                       |
| Euk. 4  | <i>Chondrus crispus</i>                  | XP_005713402.1                                       |
| Euk. 5  | <i>Saprolegnia parasitica</i> CBS 223.65 | XP_012200393.1                                       |
| Euk. 6  | <i>Aphanomyces invadans</i>              | XP_008879597.1                                       |
| Euk. 7  | <i>Galdieria sulphuraria</i>             | XP_005705561.1                                       |
| Met. 3  | <i>Drosophila willistoni</i>             | XP_015033401.1                                       |
| Met. 4  | <i>Protobothrops mucrosquamatus</i>      | XP_015682900.1                                       |
| Met. 5  | <i>Helobdella robusta</i>                | XP_009014349.1                                       |
| Met. 6  | <i>Serinus canaria</i>                   | XP_009093895.1                                       |
| Met. 7  | <i>Apis florea</i>                       | XP_012343105.1                                       |
| Met. 8  | <i>Python bivittatus</i>                 | XP_007437127.1,<br>XP_007437128.1,<br>XP_007437129.1 |
| Met. 9  | <i>Gekko japonicus</i>                   | XP_015268057.1                                       |
| Met. 10 | <i>Halyomorpha halys</i>                 | XP_014272262.1                                       |

**Table 3A. Taxa details from Figure 2(A), (B), and Figure S1.** Labels indicate the taxa labels in Figures 2(A), 2(B), and S1. Each label specifies the species name and accession number downloaded from RefSeq.

| Label   | Species                                                        | Accession no.                                        |
|---------|----------------------------------------------------------------|------------------------------------------------------|
| Bac. 1  | <i>Bordetella</i> sp. N                                        | WP_057653136.1                                       |
| Bac. 2  | <i>Lysobacter</i> sp. Root690                                  | WP_056114344.1                                       |
| Bac. 3  | <i>Amycolatopsis methanolica</i>                               | WP_017981605.1                                       |
| Bac. 4  | <i>Achromobacter xylosoxidans</i>                              | WP_013396304.1                                       |
| Bac. 5  | <i>Knoellia flava</i>                                          | WP_052116956.1                                       |
| Bac. 6  | <i>Nocardioides</i> sp. Soil774                                | WP_056601935.1                                       |
| Bac. 7  | <i>Actinosynnema mirum</i>                                     | WP_012783612.1                                       |
| Bac. 8  | <i>Arthrobacter</i> sp. MA-N2                                  | WP_028266024.1                                       |
| Bac. 9  | <i>Curtobacterium</i> sp. Leaf261                              | WP_055954596.1                                       |
| Bac. 10 | <i>Phycococcus</i> sp. Soil803                                 | WP_057377348.1                                       |
| Euk. 1  | <i>Cucumis melo</i>                                            | XP_008448951.1                                       |
| Euk. 2  | <i>Medicago truncatula</i>                                     | XP_003611170.1                                       |
| Euk. 3  | <i>Glycine max</i>                                             | XP_003517450.1                                       |
| Euk. 4  | <i>Tarenaya hassleriana</i>                                    | XP_010540447.1                                       |
| Euk. 5  | <i>Beta vulgaris</i> subsp. <i>vulgaris</i>                    | XP_010678653.1                                       |
| Euk. 6  | <i>Musa acuminata</i> subsp. <i>malaccensis</i>                | XP_009398075.1                                       |
| Euk. 7  | <i>Cicer arietinum</i>                                         | XP_004510892.1                                       |
| Euk. 8  | <i>Vigna radiata</i> var. <i>radiata</i>                       | XP_014521222.1                                       |
| Euk. 9  | <i>Morus notabilis</i>                                         | XP_010108055.1                                       |
| Euk. 10 | <i>Solanum tuberosum</i>                                       | XP_015169639.1                                       |
| Fun. 1  | <i>Encephalitozoon cuniculi</i> GB-M1                          | NP_586424.1                                          |
| Fun. 2  | <i>Torulaspora delbrueckii</i>                                 | XP_003680922.1                                       |
| Fun. 3  | <i>Trametes versicolor</i> FP-101664 SS1                       | XP_008044753.1                                       |
| Fun. 4  | <i>Kazachstania africana</i> CBS 2517                          | XP_003954912.1                                       |
| Fun. 5  | <i>Dichomitus squalens</i> LYAD-421 SS1                        | XP_007365208.1                                       |
| Fun. 6  | <i>Puccinia graminis</i> f. sp. <i>tritici</i> CRL 75-36-700-3 | XP_003322083.2                                       |
| Fun. 7  | <i>Coniophora puteana</i> RWD-64-598 SS2                       | XP_007775552.1                                       |
| Fun. 8  | <i>Eremothecium cymbalariae</i> DBVPG#7215                     | XP_003647557.1                                       |
| Fun. 9  | <i>Moniliophthora roreri</i> MCA 2997                          | XP_007853138.1                                       |
| Fun. 10 | <i>Encephalitozoon intestinalis</i> ATCC 50506                 | XP_003073966.1                                       |
| Met. 1  | <i>Jaculus jaculus</i>                                         | XP_004666971.1                                       |
| Met. 2  | <i>Chrysochloris asiatica</i>                                  | XP_006863382.1                                       |
| Met. 3  | <i>Odobenus rosmarus divergens</i>                             | XP_004398631.1                                       |
| Met. 4  | <i>Priapulus caudatus</i>                                      | XP_014664176.1                                       |
| Met. 5  | <i>Ovis aries musimon</i>                                      | XP_011978134.1                                       |
| Met. 6  | <i>Trichechus manatus latirostris</i>                          | XP_004376138.1                                       |
| Met. 7  | <i>Dasypus novemcinctus</i>                                    | XP_004447311.1                                       |
| Met. 8  | <i>Nannospalax galili</i>                                      | XP_008854136.1,<br>XP_008854137.1,<br>XP_008854138.1 |
| Met. 9  | <i>Rattus norvegicus</i>                                       | XP_008766000.1                                       |
| Met. 10 | <i>Capra hircus</i>                                            | XP_005693518.1                                       |

**Table S3B. Taxa details from Figure 2(C), (D).** Labels indicate the taxa labels in Figures 2(C) and 2(D). Each label specifies the species name and accession number downloaded from RefSeq.

| Label   | Species                                                 | Accession no.  |
|---------|---------------------------------------------------------|----------------|
| Bac. 1  | <i>Leptospira meyeri</i>                                | WP_004787080.1 |
| Bac. 2  | <i>Nonomuraea coxensis</i>                              | WP_026214713.1 |
| Bac. 3  | <i>Actinomadura rifamycini</i>                          | WP_051300306.1 |
| Bac. 4  | <i>Marmoricola aequoreus</i>                            | WP_030484673.1 |
| Bac. 5  | <i>Kytococcus sedentarius</i>                           | WP_049758670.1 |
| Bac. 6  | <i>Nocardioides</i>                                     | WP_056707204.1 |
| Bac. 7  | <i>Myxococcus fulvus</i>                                | WP_046713442.1 |
| Bac. 8  | <i>Chondromyces apiculatus</i>                          | WP_044234766.1 |
| Bac. 9  | <i>Phycococcus</i> sp. Root101                          | WP_056918311.1 |
| Bac. 10 | <i>Nitriliruptor alkaliphilus</i>                       | WP_052668139.1 |
| Euk. 1  | <i>Acanthamoeba castellanii</i> str. Neff               | XP_004367908.1 |
| Euk. 2  | <i>Capsaspora owczarzaki</i> ATCC 30864                 | XP_004343108.1 |
| Euk. 3  | <i>Aphanomyces invadans</i>                             | XP_008862617.1 |
| Euk. 4  | <i>Saprolegnia diclina</i> VS20                         | XP_008605694.1 |
| Euk. 5  | <i>Acytostelium subglobosum</i> LB1                     | XP_012754808.1 |
| Euk. 6  | <i>Monosiga brevicollis</i> MX1                         | XP_001745020.1 |
| Euk. 7  | <i>Dictyostelium discoideum</i> AX4                     | XP_645447.1    |
| Euk. 8  | <i>Aureococcus anophagefferens</i>                      | XP_009039197.1 |
| Euk. 9  | <i>Monoraphidium neglectum</i>                          | XP_013896596.1 |
| Euk. 10 | <i>Fonticula alba</i>                                   | XP_009493401.1 |
| Fun. 1  | <i>Punctularia strigosozonata</i>                       | XP_007381255.1 |
| Fun. 2  | <i>Wallemia ichthyophaga</i> EXF-994                    | XP_009266318.1 |
| Fun. 3  | <i>Coniophora puteana</i> RWD-64-598 SS2                | XP_007766588.1 |
| Fun. 4  | <i>Puccinia graminis</i> f. sp. tritici CRL 75-36-700-3 | XP_003327856.1 |
| Met. 2  | <i>Amyelois transitella</i>                             | XP_013199717.1 |
| Met. 3  | <i>Plutella xylostella</i>                              | XP_011563596.1 |
| Met. 5  | <i>Papilio polytes</i>                                  | XP_013143494.1 |
| Met. 6  | <i>Bombyx mori</i>                                      | XP_012546269.1 |

**Table S3C. Taxa details from Figure 2(E), (F).** Labels indicate the taxa labels in Figures 2(E) and 2(F). Each label specifies the species name and accession number downloaded from RefSeq.

\*Note: All downloaded RefSeq sequences used for the analyses have been uploaded to the accompanying GitHub site.

| Genes     | % Identity         |                      |                       |                  |                        |                      |                        |                 |      |  |
|-----------|--------------------|----------------------|-----------------------|------------------|------------------------|----------------------|------------------------|-----------------|------|--|
|           | <i>E. dunlapae</i> | <i>C. astericola</i> | <i>V. multiformis</i> | <i>P. bachei</i> | <i>D. glandiformis</i> | <i>B. abyssicola</i> | <i>B. infundibulum</i> | <i>M. leidy</i> | (FL) |  |
| ML012034a | 59                 | 57                   | 58                    | 58               | 64                     | 63                   | 65                     | 60              | 60   |  |
| ML005129a | 62                 | 68                   | 99                    | 75               | 61                     | 55                   | 73                     | 99              | 99   |  |
| ML18354a  | 88                 | 90                   | 89                    | 90               |                        | 31                   | 92                     | 95              | 95   |  |
| ML00955a  | 61                 | 68                   | 65                    | 62               | 70                     |                      | 79                     | 99              | 99   |  |
| ML02771a  |                    | 48                   | 54                    | 43               | 58                     |                      | 34                     | 100             | 100  |  |
| ML49231a  | 56                 |                      |                       | 67               | 71                     | 72                   |                        | 99              | 99   |  |
| ML00555a  | 41                 | 70                   |                       | 63               |                        | 69                   |                        | 91              | 91   |  |
| ML42441a  |                    | 65                   | 69                    | 26               |                        |                      | 80                     | 100             | 100  |  |
| ML219316a |                    | 51                   | 58                    | 54               | 64                     | 75                   | 90                     | 97              | 97   |  |

**Table S4. Percent identity from BLAST for genes from Figure 4.**

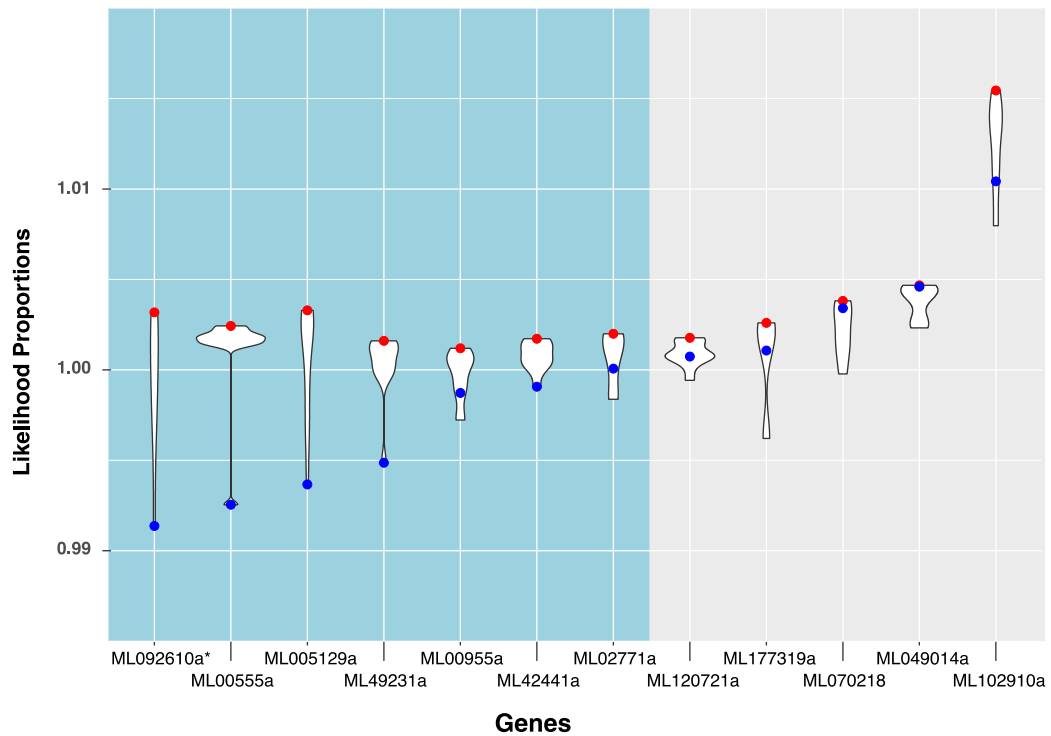

**Figure S3. Manually generated suboptimal trees.** Suboptimal distributions are a result of manually shuffling clades of three taxa. Results from analyses using bootstrap trees (Fig. 3) and manually created suboptimal trees are similar, but the spread of distribution of bootstrap trees is greater, making conclusions derived from comparisons to the bootstrap distributions more conservative. Red points indicate likelihood proportions of the best tree (i.e., tree indicating HGT). Blue points indicate likelihood proportions of the metazoan constrained tree (i.e., tree contradicting HGT). The side in teal shows HGT candidates validated by hypothesis testing and the side in gray shows HGT candidates unsupported by hypothesis testing. The asterisk indicates a gene that was later removed from contention.

| Gene      | Best non-animal E-val | Non-animal species           | Best animal E-val | Animal species      |
|-----------|-----------------------|------------------------------|-------------------|---------------------|
| ML012034a | 5.60E-77              | Pythium ultimum (Euk)        | 3.60E-07          | Macrostomum lignano |
| ML18354a  | 2.80E-76              | Oryza rufipogon (Euk)        | 2.00E-20          | Lygus hesperus      |
| ML219316a | 6.70E-43              | Gimesia maris DSM 8797 (Bac) | 1.60E-17          | Philodina roseola   |

**Table S5. HMMER analysis on genes classified as absent in animals in RefSeq.**

Non-animals species indicate the best hit to non-animals, while animal species indicate the best animal hits.
